# Supplementary material for: Tailored cutting of carbon nanotubes and controlled dispersion of metal nanoparticles inside their channels
Source: Royal Society of Chemistry journal article supplement (doi:10.1039/b811560e), 2008-01-01
Supplement: b811560e.pdf [file b811560e.pdf]

## Electronic Supplementary Information (ESI)

### Tailored Cutting of Carbon Nanotubes and Controlled Dispersion of Metal Nanoparticles inside their Channels

Chuanfu Wang, Shujing Guo, Xiulian Pan\*, Wei Chen, Xinhe Bao\*

State Key Laboratory of Catalysis, Dalian Institute of Chemical Physics, Chinese Academy of  
Sciences, Zhongshan Road 457, Dalian 116023, China,  
Fax: (+)86 411 84694447, E-mail: [panxl@dicp.ac.cn](mailto:panxl@dicp.ac.cn); [xhbao@dicp.ac.cn](mailto:xhbao@dicp.ac.cn)

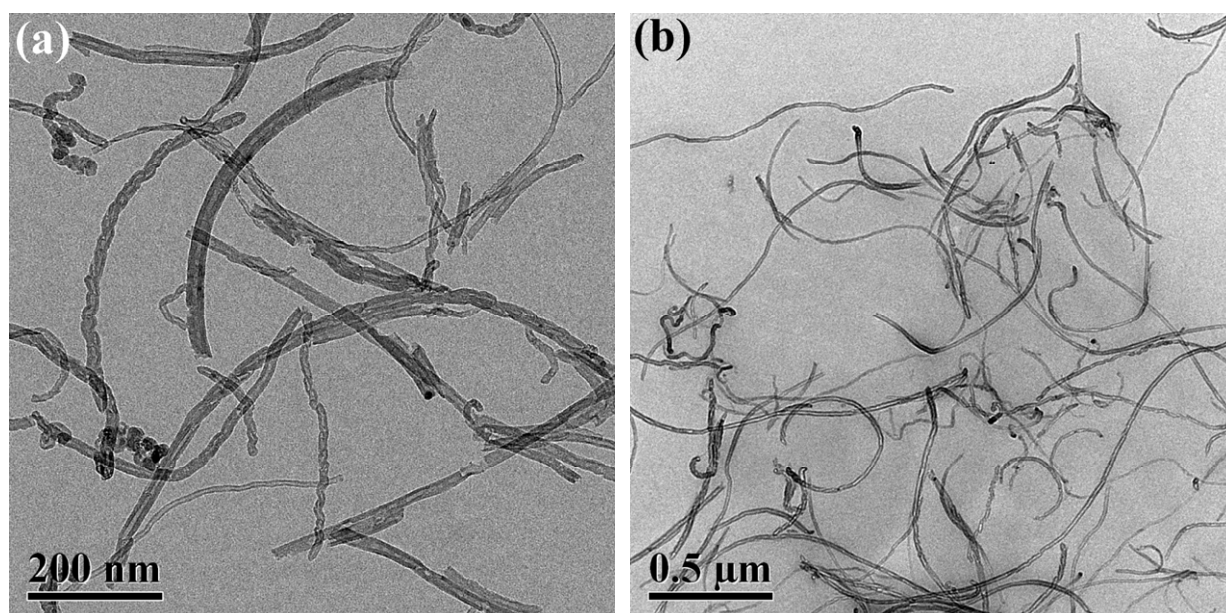

**Fig. S1** TEM images for (a) 2% Ag/CNTs; (b) 0.5% Ag/CNTs after oxidation for 105 min at 300 °C.

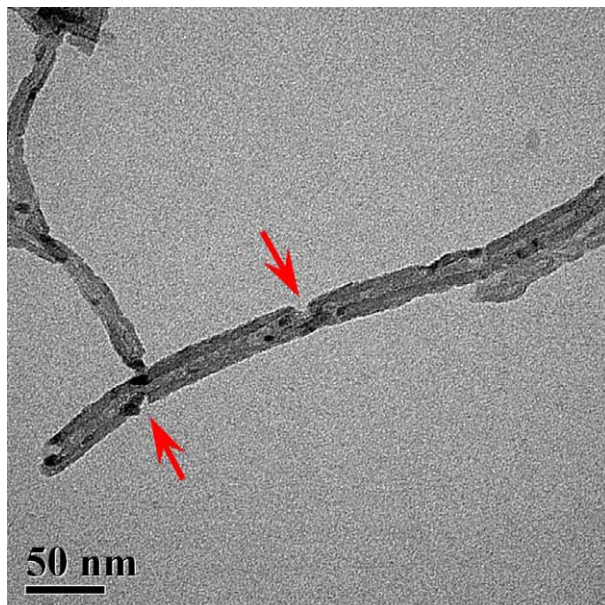

**Fig. S2** TEM image for 5% Fe/CNTs after oxidation for 30 min at 460 °C, with arrows pointing to the pits on the nanotube.

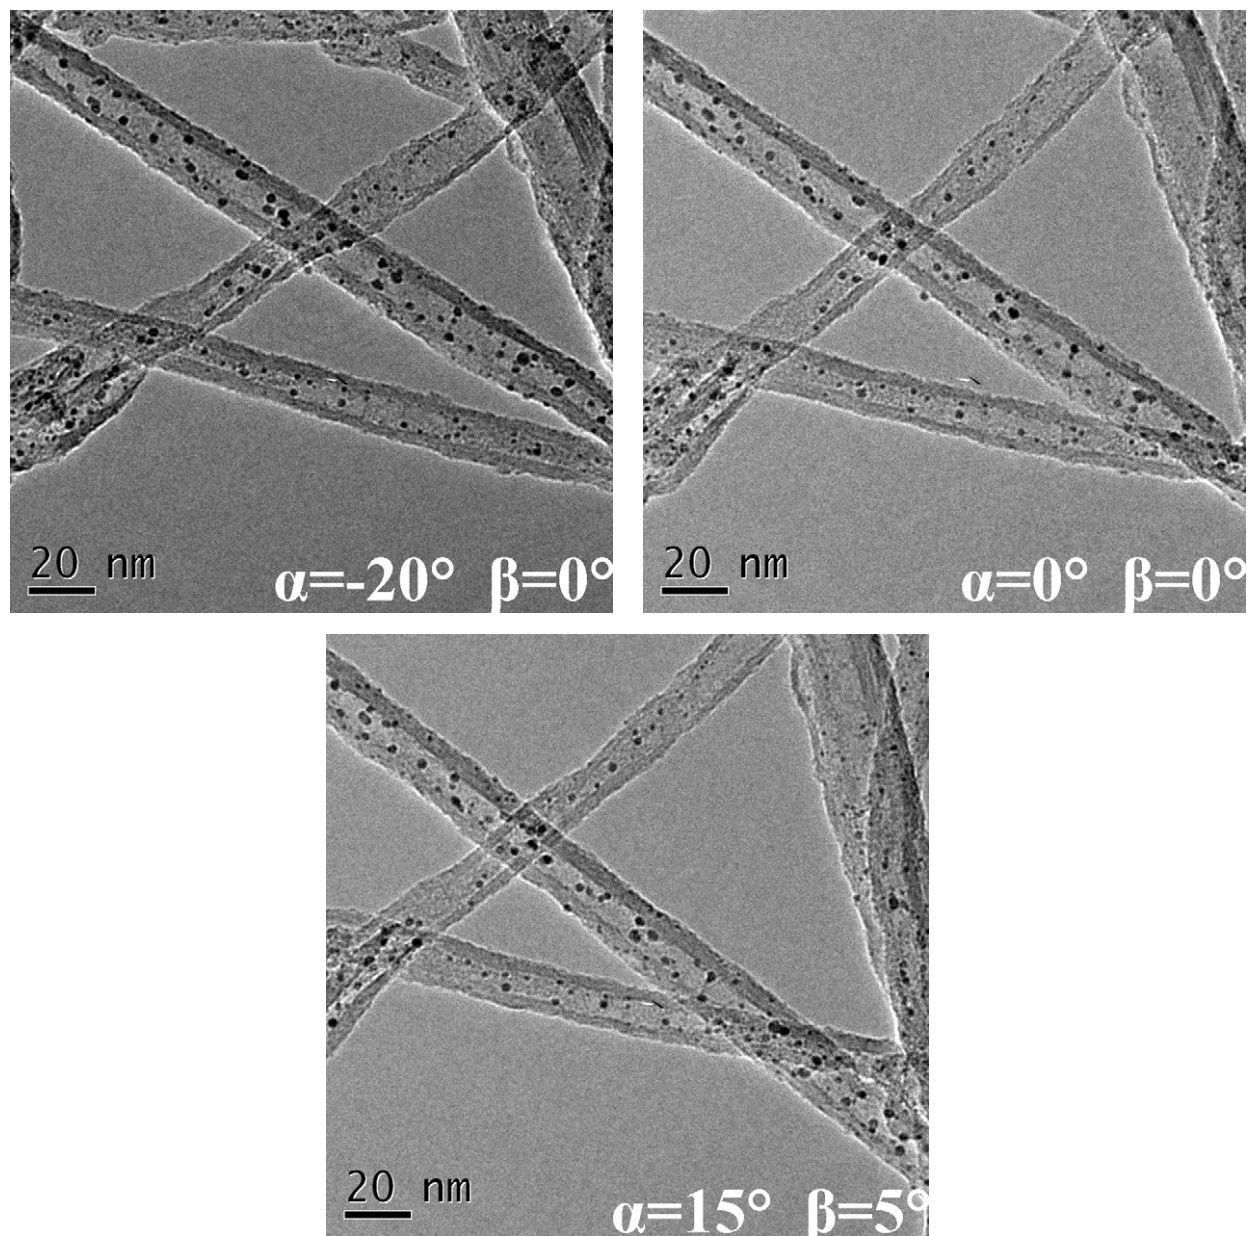

**Fig. S3** TEM images for the CNT-encapsulated Ru particles rotating under the microscope.
